# Supplementary material for: Oncogenic context shapes the fitness landscape of tumor suppression
Source: PubMed Central journal article supplement (PMC10570323; doi:10.1038/s41467-023-42156-y), 2023-10-12
Supplement: 41467_2023_42156_MOESM4_ESM.pdf [file 41467_2023_42156_MOESM4_ESM.pdf]

## **Description of Additional Supplementary Files**

Supplementary Data 1

Description: Individual mouse metadata
